# Supplementary material for: Immunogenicity and Safety of COVID-19 Vaccines among People Living with HIV: A Systematic Review and Meta-Analysis
Source: MDPI journal article supplement (doi:10.3390/vaccines10091569), 2022-09-19
Supplement: s1 [file s1]

## **Supplemental Materials**

Text S1: Detailed Search Strategies

Figure S1: Flowchart of study selection

Figure S2: The SMD of geometric mean titer among people living with HIV and healthy controls.

Figure S3: The incidence rates of adverse events among people living with HIV.

Figure S4: Sensitivity analysis of seroconversion rates by excluding studies with a high risk of bias.

Figure S5: Sensitivity analysis of risk ratio of seroconversion by excluding studies with a high risk of bias.

Figure S6: Sensitivity analysis of incidence rates of adverse events by excluding studies with a high risk of bias.

Figure S7: Sensitivity analysis of seroconversion rates by excluding studies with the number of people living with HIV less than 100.

Figure S8: Sensitivity analysis of risk ratio of seroconversion by excluding studies with the number of people living with HIV less than 100.

Figure S9 Sensitivity analysis of incidence rates of adverse events by excluding studies with the number of people living with HIV less than 100.

Figure S10: The publication bias of studies on seroconversion rates among people living with HIV after a first or second dose of COVID-19 vaccine

Figure S11: The publication bias of studies on seroconversion among people living with HIV compared with healthy controls after a first or second dose of COVID-19 vaccine

Figure S12: The publication bias of studies on incidence rates of adverse events among people living with HIV after a first or second dose of COVID-19 vaccine

Table S1: Characteristics and basic information of the studies included in the systematic review and meta-analysis for COVID-19 vaccine immunogenicity

Table S2: Characteristics and basic information of the studies included in the systematic review and meta-analysis for COVID-19 vaccine safety

Table S3: Risk of bias of all included randomized clinical trials using the revised Cochrane risk-of-bias tool for randomized trials (RoB 2)

Table S4: Risk of bias of all included non-randomized clinical trials using the Risk of Bias in Non-randomized Studies of Interventions (ROBINS-I) tool

Table S5: Risk of bias of all included cohort studies using the Newcastle-Ottawa quality assessment scale

Table S6: Risk of bias of all included case-control studies using the Newcastle-Ottawa quality assessment scale

Table S7: Risk of bias of all included cross-sectional studies using the Agency for Healthcare Research and Quality scale

## **Text S1: Detailed Search Strategies**

### **Database: PubMed**

**Search terms:** ((COVID-19[MeSH Terms]) OR (SARS-CoV-2[MeSH Terms]) OR (Severe Acute Respiratory Syndrome Coronavirus 2) OR (coronavirus disease 2019) OR (SARS-CoV\*) OR (SARS Coronavirus\*) OR (covid\*)) AND ((HIV[MeSH Terms]) OR (Acquired Immunodeficiency Syndrome[MeSH Terms]) OR (HIV\*) OR (Human immunodeficiency virus\*) OR (Human immune deficiency virus\*) OR (AIDS\*) OR (Acquired Immunodeficiency Syndrome\*) OR (acquired immune deficiency syndrome\*)) AND ((COVID-19 Vaccines[MeSH Terms]) OR (Vaccines[MeSH Terms]) OR (Vaccination[MeSH Terms]) OR (Vaccin\*)) AND (("2020/01/01"[Date - Publication] : "2022/04/29"[Date - Publication]))

### **Database: EMBASE**

**Search terms:** ('severe acute respiratory syndrome coronavirus 2'/exp OR 'coronavirus disease 2019'/exp OR ('severe acute respiratory syndrome coronavirus 2' OR 'coronavirus disease 2019' OR 'sars-cov\*' OR 'sars coronavirus\*' OR 'covid\*')) AND ('human immunodeficiency virus'/exp OR 'human immunodeficiency virus infection'/exp OR 'acquired immune deficiency syndrome'/exp OR ('hiv\*' OR 'human immunodeficiency virus\*' OR 'acquired immunodeficiency syndrome\*' OR 'aids\*' OR 'human immune deficiency virus\*' OR 'acquired immune deficiency syndrome\*')) AND ('sars-cov-2 vaccine'/exp OR 'vaccine'/exp OR 'vaccin\*') AND [embase]/lim AND [01-01-2020]/sd NOT [30-04-2022]/sd

### **Database: Web of Science**

**Search terms:** TS= (covid-19 OR Severe Acute Respiratory Syndrome Coronavirus 2 OR coronavirus disease 2019 OR SARS-CoV\* OR SARS Coronavirus\* OR covid\*) AND TS= (HIV\* OR Human immunodeficiency virus\* OR Human immune deficiency virus\* OR AIDS\* OR acquired immunodeficiency syndrome\* OR acquired immune deficiency syndrome\*) AND TS= (Vaccin\* OR COVID-19 Vaccin\* OR SARS-CoV-2 vaccin\*) AND ("2020/01/01"[Date - Publication]: "2022/04/29"[Date - Publication])

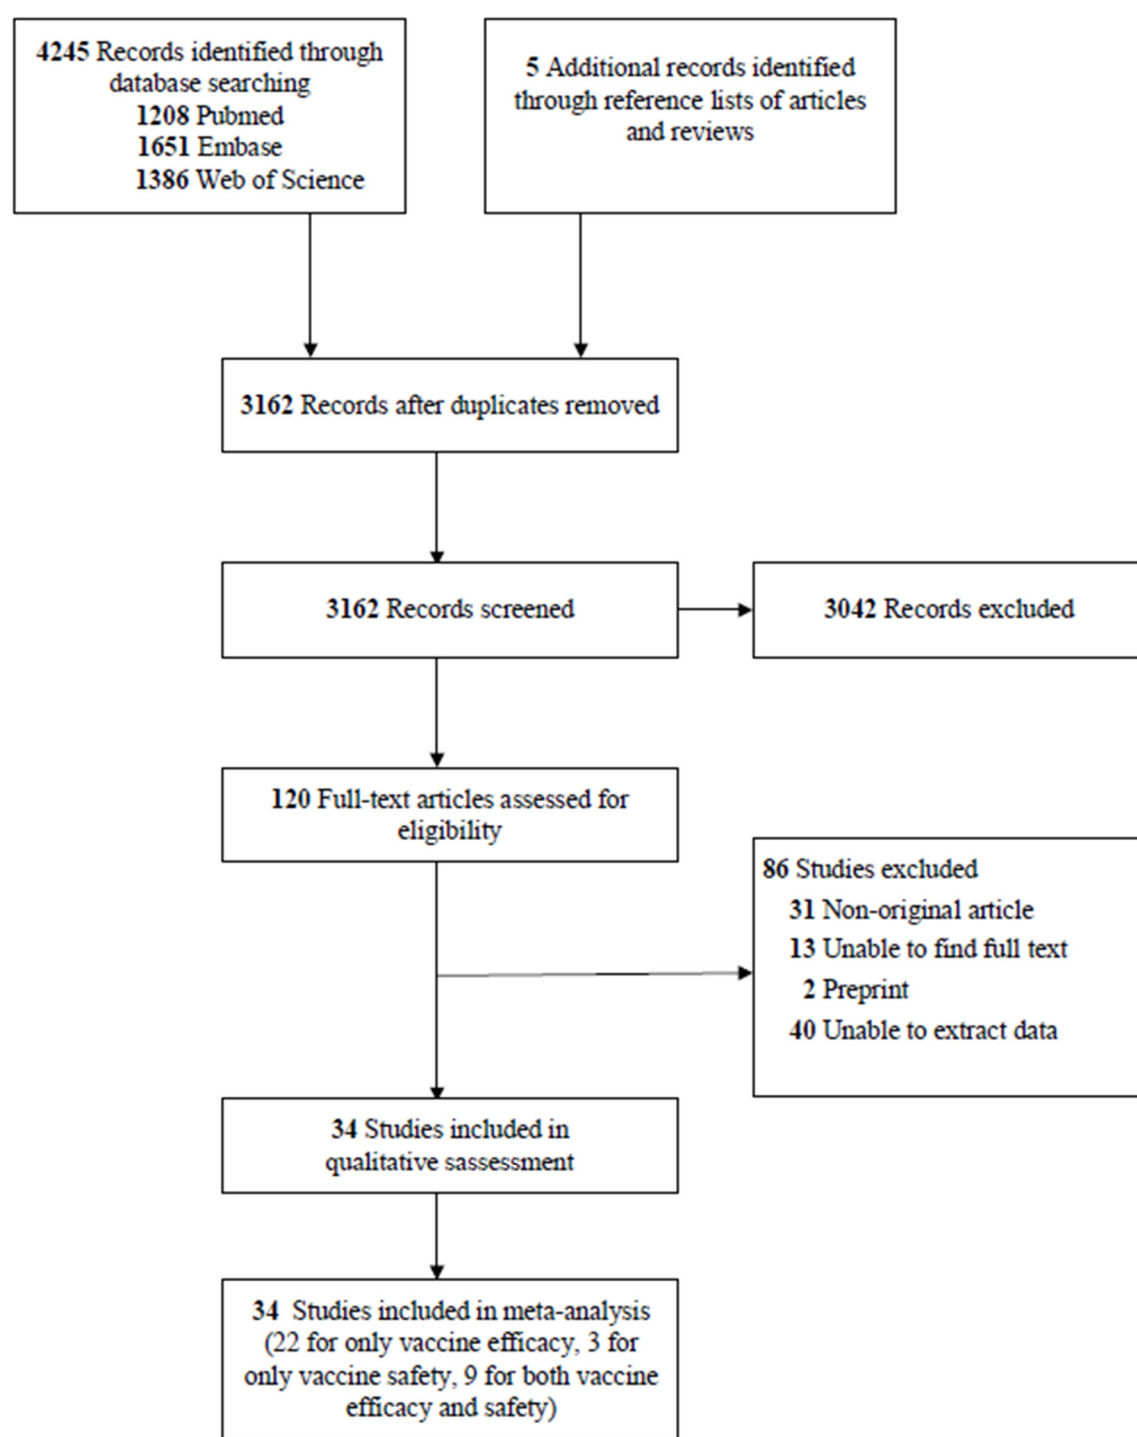

Figure S1: Flowchart of study selection

### The first dose

#### Author (year)

Khan et al (2021) [46]

Portillo et al (2021) [64]

**Overall( $I^2=89.5\%$ ,  $p=0.002$ )**

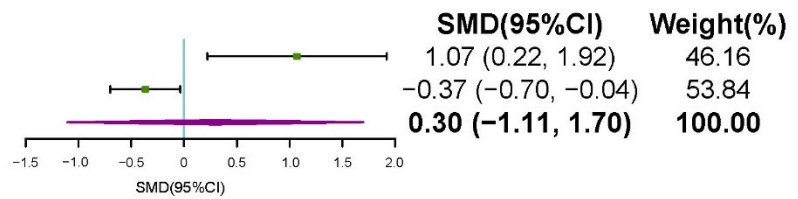

### The second dose

#### Author (year)

Huang et al (2022) [44]

Levy et al (2021) [20]

Rahav et al (2021) [62]

Frater et al (2021) [60]

Portillo et al (2021) [64]

**Overall( $I^2=40.5\%$ ,  $p=0.151$ )**

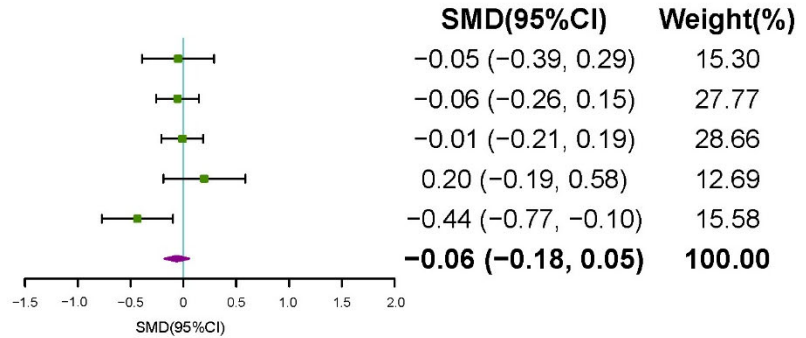

Figure S2: The SMD of geometric mean titer among people living with HIV and healthy controls.

SMD: standardized mean difference; CI: confidence interval

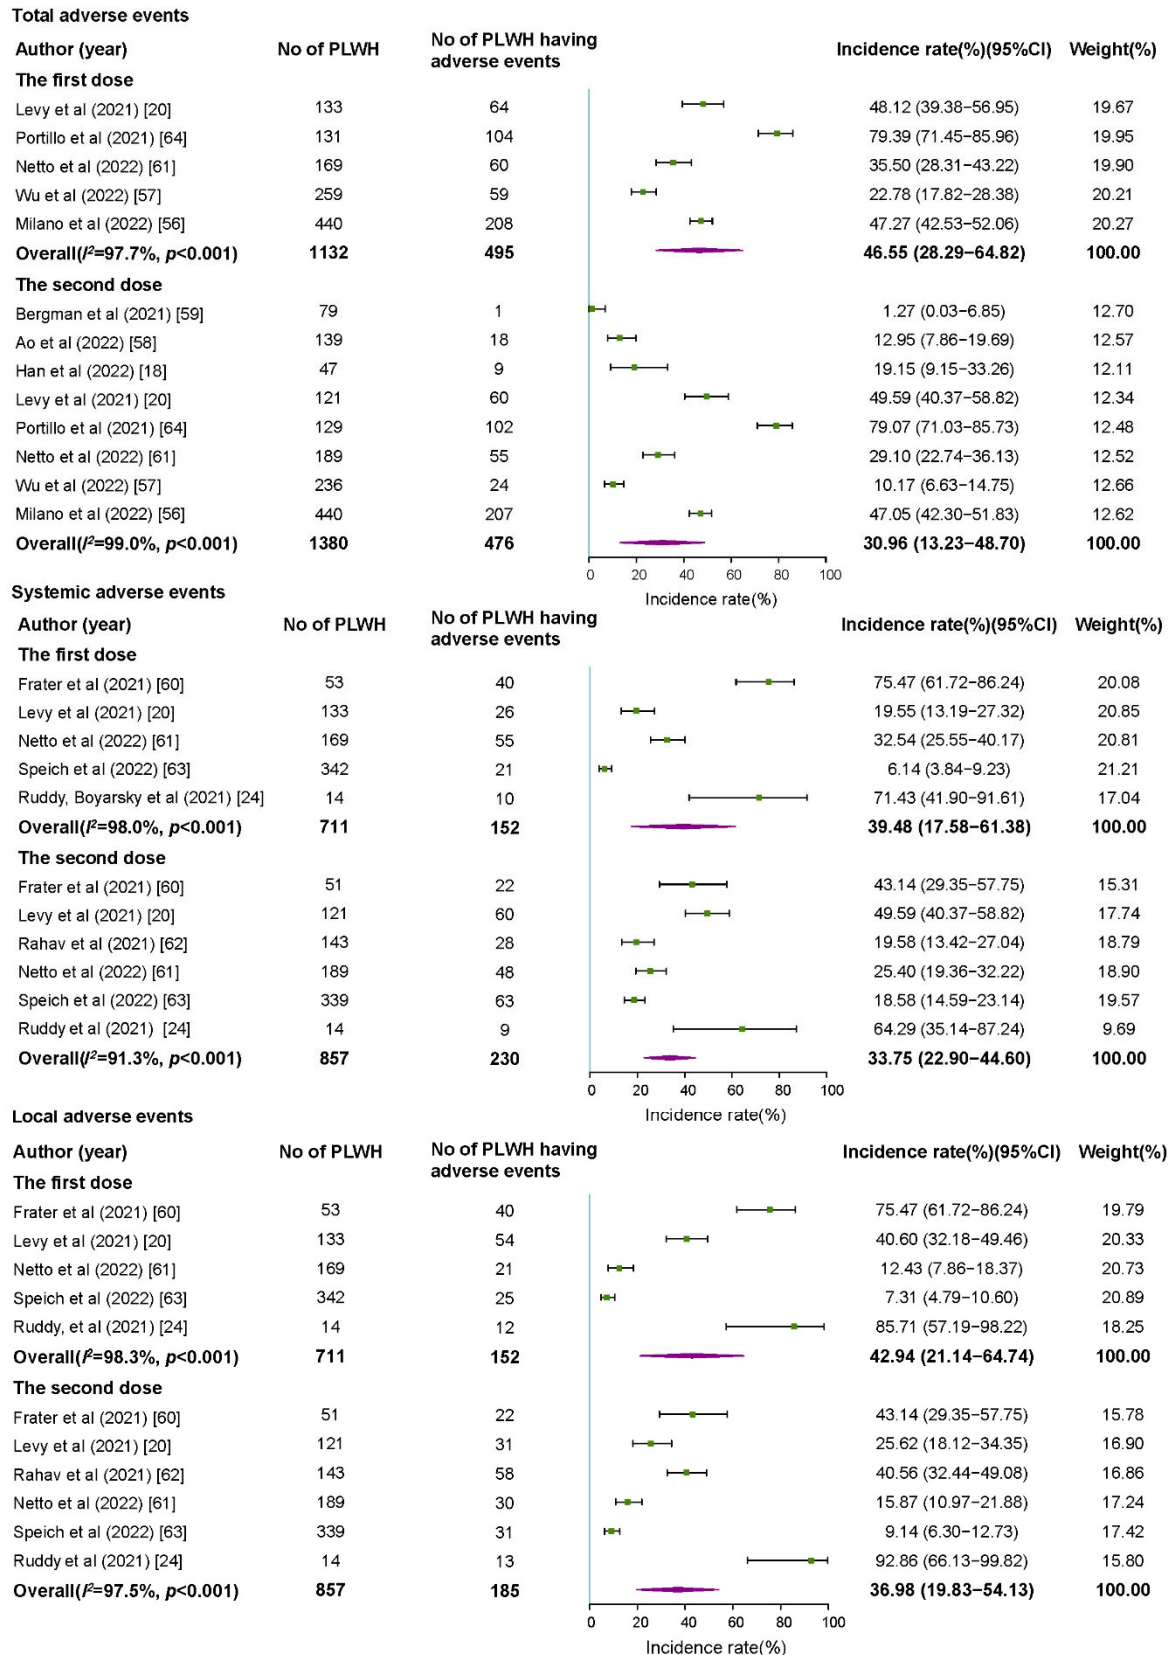

Figure S3: The incidence rates of adverse events among people living with HIV. PLWH: people living with HIV; CI: confidence interval.

### The first dose

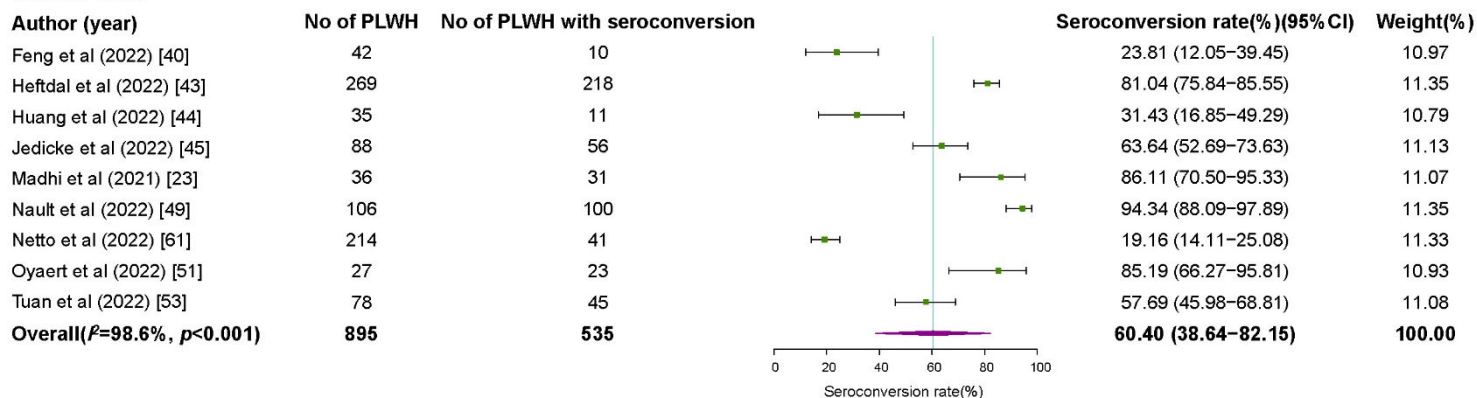

### The second dose

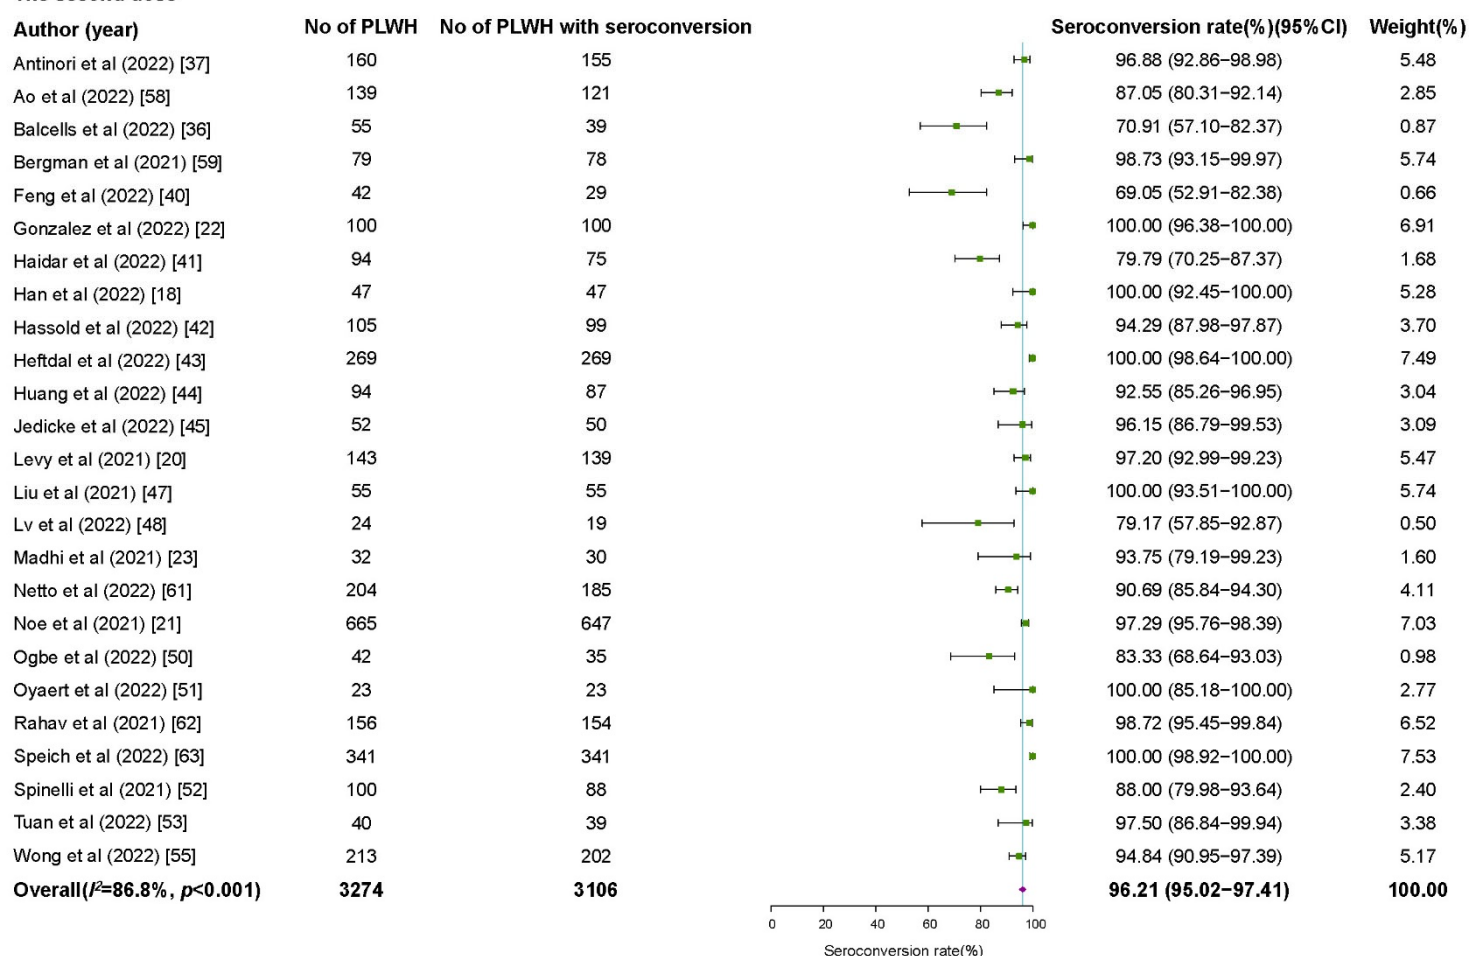

Figure S4: Sensitivity analysis of seroconversion rates by excluding studies with a high risk of bias.

PLWH: people living with HIV; CI: confidence interval.

### The first dose

| Author (year)                                                    | PLWH(n <sub>s</sub> /N) | Healthy controls(n <sub>s</sub> /N) | RR(95%CI)               | Weight(%)     |
|------------------------------------------------------------------|-------------------------|-------------------------------------|-------------------------|---------------|
| Feng et al (2022) [40]                                           | 10/42                   | 20/28                               | 0.33 (0.18–0.60)        | 8.59          |
| Heftdal et al (2022) [43]                                        | 218/269                 | 355/538                             | 1.23 (1.13–1.34)        | 16.40         |
| Jedicke et al (2022) [45]                                        | 56/88                   | 41/41                               | 0.64 (0.55–0.75)        | 15.66         |
| Madhi et al (2021) [23]                                          | 31/36                   | 18/23                               | 1.10 (0.86–1.42)        | 14.25         |
| Nault et al (2022) [49]                                          | 100/106                 | 19/20                               | 0.99 (0.89–1.11)        | 16.17         |
| Netto et al (2022) [61]                                          | 41/214                  | 114/295                             | 0.50 (0.36–0.68)        | 13.24         |
| Oyaert et al (2022) [51]                                         | 23/27                   | 54/54                               | 0.85 (0.73–1.00)        | 15.70         |
| <b>Overall(<math>I^2=93.7\%</math>, <math>p&lt;0.001</math>)</b> | <b>479/782</b>          | <b>621/999</b>                      | <b>0.79 (0.62–1.01)</b> | <b>100.00</b> |

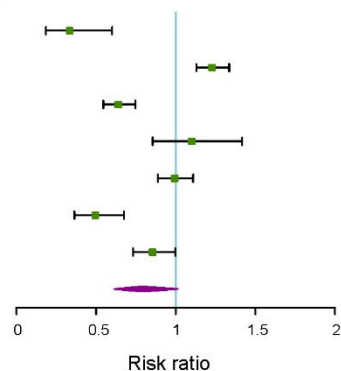

### The second dose

| Author (year)                                                    | PLWH(n <sub>s</sub> /N) | Healthy controls(n <sub>s</sub> /N) | RR(95%CI)               | Weight(%)     |
|------------------------------------------------------------------|-------------------------|-------------------------------------|-------------------------|---------------|
| Antinori et al (2022) [37]                                       | 155/160                 | 168/168                             | 0.97 (0.94–1.00)        | 7.96          |
| Ao et al (2022) [58]                                             | 121/139                 | 119/120                             | 0.88 (0.82–0.94)        | 6.91          |
| Balcells et al (2022) [38]                                       | 39/55                   | 60/65                               | 0.77 (0.64–0.92)        | 3.34          |
| Bergman et al (2021) [59]                                        | 78/79                   | 78/78                               | 0.99 (0.96–1.01)        | 8.01          |
| Feng et al (2022) [40]                                           | 29/42                   | 20/28                               | 0.97 (0.71–1.32)        | 1.59          |
| Haidar et al (2022) [41]                                         | 75/94                   | 159/172                             | 0.86 (0.77–0.96)        | 5.38          |
| Han et al (2022) [18]                                            | 47/47                   | 18/18                               | 1.00 (0.92–1.08)        | 6.39          |
| Heftdal et al (2022) [43]                                        | 269/269                 | 536/538                             | 1.00 (1.00–1.01)        | 8.22          |
| Jedicke et al (2022) [45]                                        | 50/52                   | 41/41                               | 0.96 (0.91–1.02)        | 7.31          |
| Levy et al (2021) [20]                                           | 139/143                 | 258/261                             | 0.98 (0.95–1.01)        | 7.90          |
| Lv et al (2022) [48]                                             | 19/24                   | 21/24                               | 0.90 (0.70–1.17)        | 2.15          |
| Madhi et al (2021) [23]                                          | 30/32                   | 22/23                               | 0.98 (0.87–1.11)        | 4.90          |
| Netto et al (2022) [61]                                          | 185/204                 | 265/274                             | 0.94 (0.89–0.98)        | 7.45          |
| Oyaert et al (2022) [51]                                         | 23/23                   | 52/52                               | 1.00 (0.94–1.07)        | 6.94          |
| Rahav et al (2021) [62]                                          | 154/156                 | 269/272                             | 1.00 (0.98–1.02)        | 8.06          |
| Wong et al (2022) [55]                                           | 202/213                 | 78/80                               | 0.97 (0.93–1.02)        | 7.50          |
| <b>Overall(<math>I^2=95.7\%</math>, <math>p&lt;0.001</math>)</b> | <b>1615/1732</b>        | <b>2164/2214</b>                    | <b>0.96 (0.92–1.00)</b> | <b>100.00</b> |

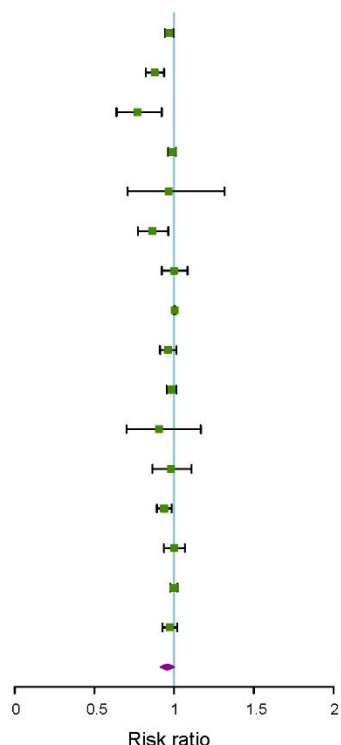

Figure S5: Sensitivity analysis of risk ratio of seroconversion by excluding studies with a high risk of bias.

PLWH: people living with HIV; n<sub>s</sub>: number of people with seroconversion; N: group size; RR: risk ratio; CI: confidence interval.



### Total adverse events

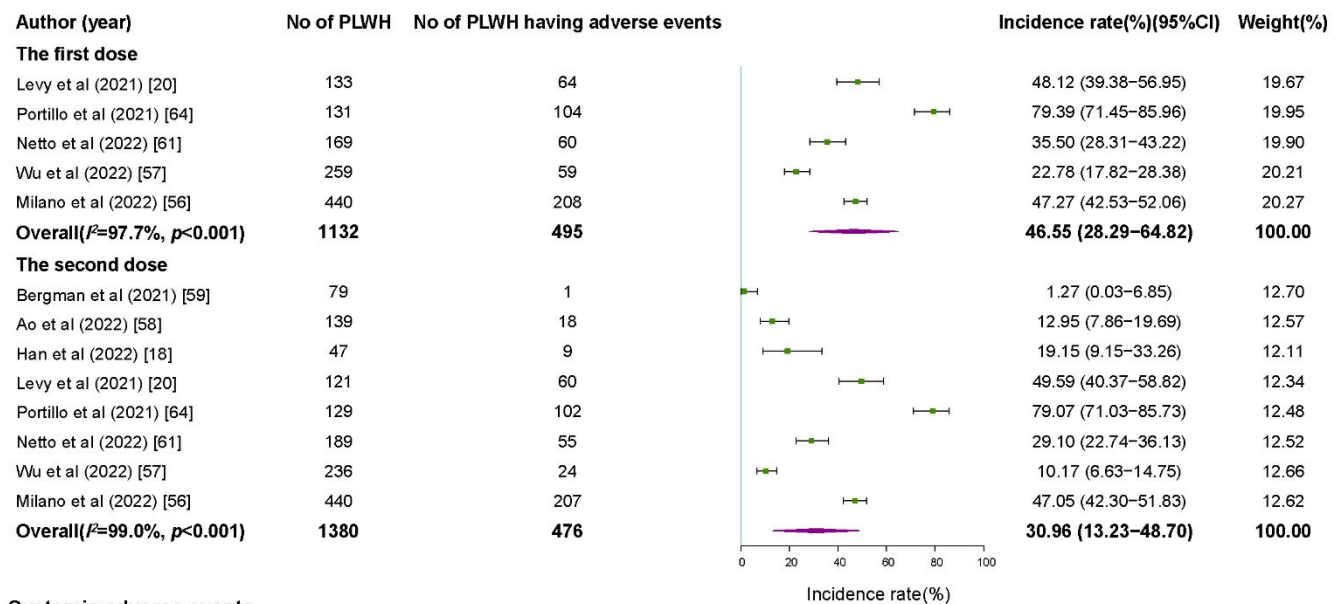

### Systemic adverse events

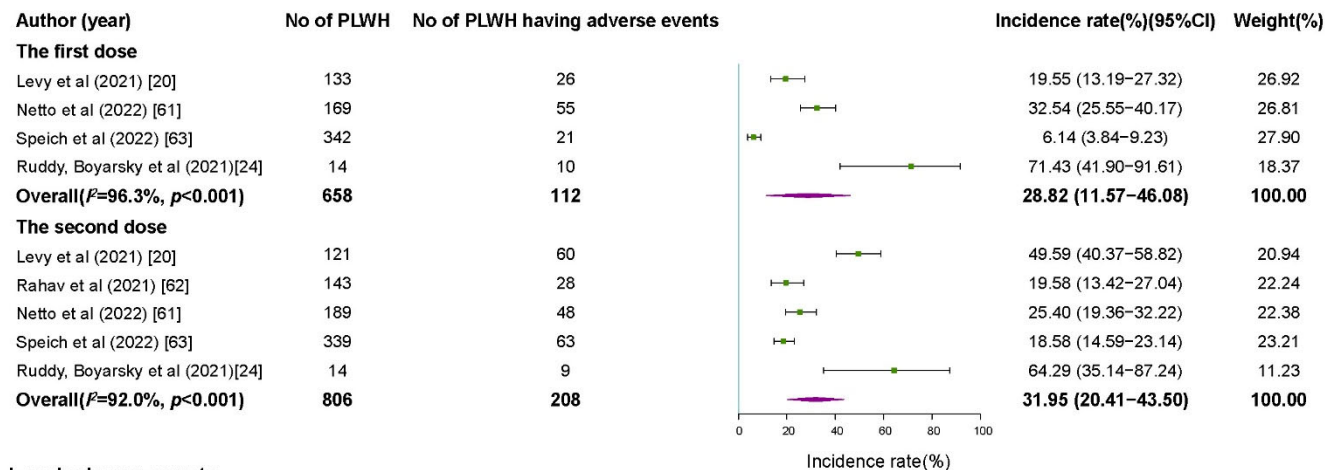

### Local adverse events

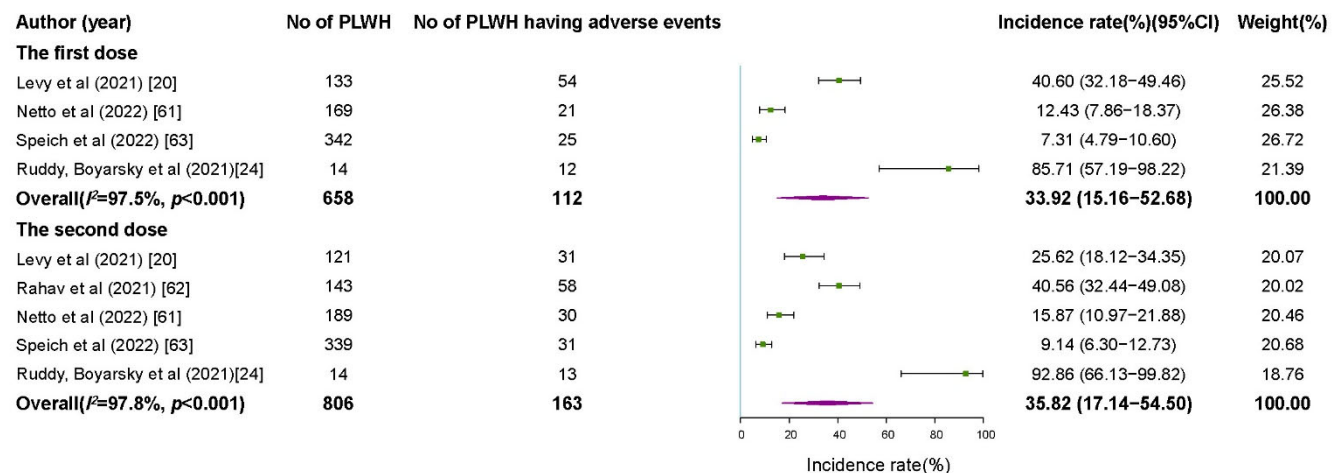

Figure S6: Sensitivity analysis of incidence rates of adverse events by excluding studies with a high risk of bias.

PLWH: people living with HIV; CI: confidence interval.



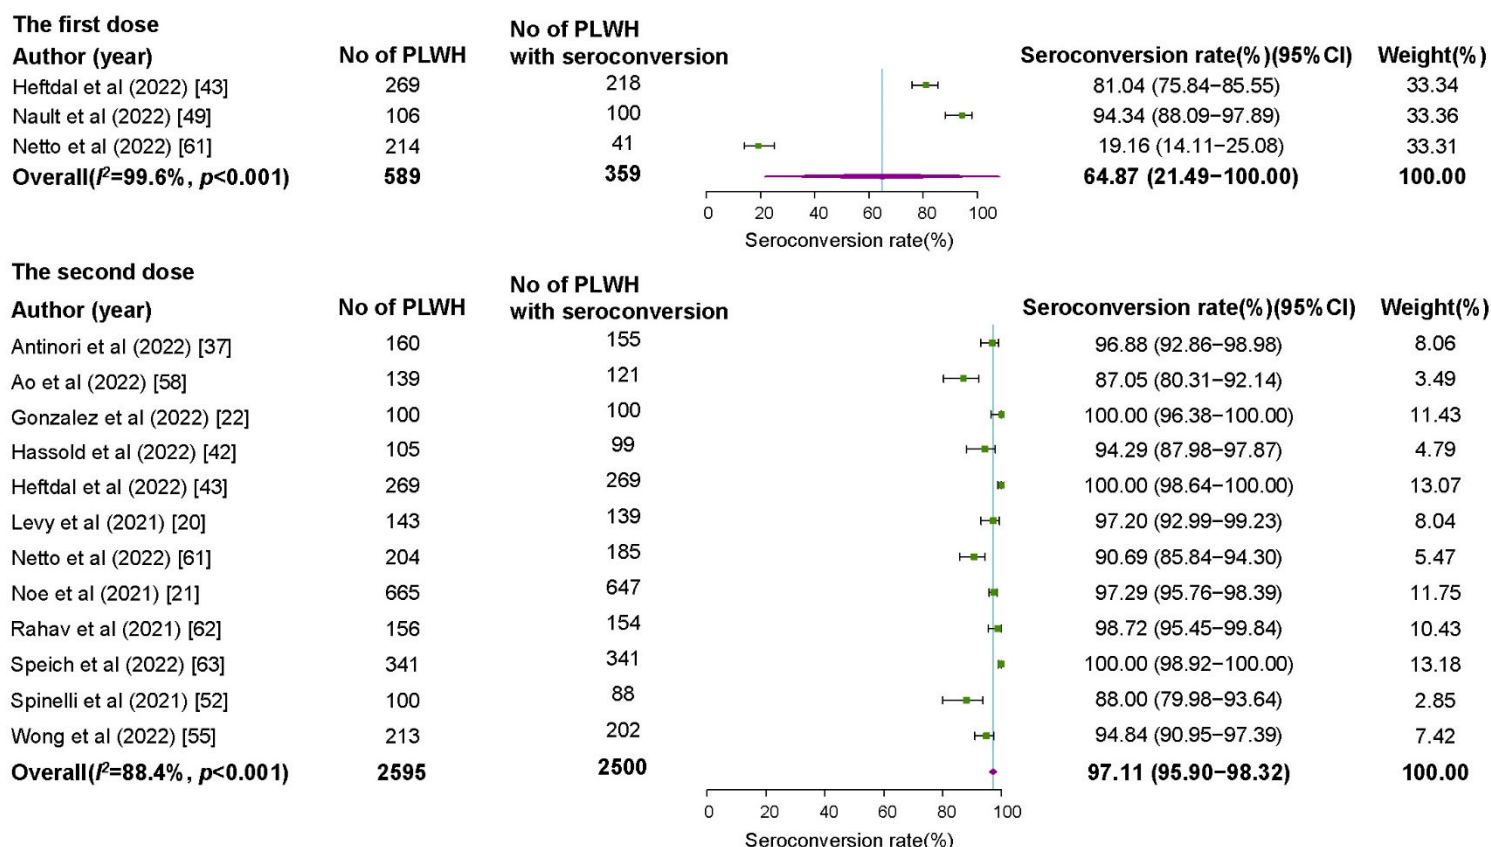

Figure S7: Sensitivity analysis of seroconversion rates by excluding studies with number of people living with HIV less than 100.

PLWH: people living with HIV; CI: confidence interval.

### The first dose

| Author (year)                                                    | PLWH( $n_s/N$ ) | Healthy controls( $n_s/N$ ) | RR(95%CI)               | Weight(%)     |
|------------------------------------------------------------------|-----------------|-----------------------------|-------------------------|---------------|
| Heftdal et al (2022) [43]                                        | 218/269         | 355/538                     | 1.23 (1.13–1.34)        | 36.08         |
| Nault et al (2022) [49]                                          | 100/106         | 19/20                       | 0.99 (0.89–1.11)        | 35.51         |
| Netto et al (2022) [61]                                          | 41/214          | 114/295                     | 0.50 (0.36–0.68)        | 28.41         |
| <b>Overall(<math>I^2=95.1\%</math>, <math>p&lt;0.001</math>)</b> | <b>359/589</b>  | <b>488/853</b>              | <b>0.88 (0.62–1.24)</b> | <b>100.00</b> |

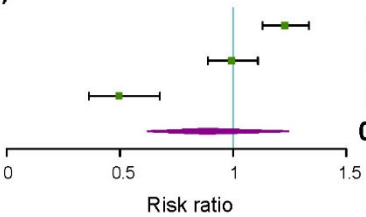

### The second dose

| Author (year)                                                    | PLWH( $n_s/N$ )  | Healthy controls( $n_s/N$ ) | RR(95%CI)               | Weight(%)     |
|------------------------------------------------------------------|------------------|-----------------------------|-------------------------|---------------|
| Antinori et al (2022) [37]                                       | 155/160          | 168/168                     | 0.97 (0.94–1.00)        | 14.87         |
| Ao et al (2022) [58]                                             | 121/139          | 119/120                     | 0.88 (0.82–0.94)        | 12.38         |
| Heftdal et al (2022) [43]                                        | 269/269          | 536/538                     | 1.00 (1.00–1.01)        | 15.51         |
| Levy et al (2021) [20]                                           | 139/143          | 258/261                     | 0.98 (0.95–1.01)        | 14.73         |
| Netto et al (2022) [61]                                          | 185/204          | 265/274                     | 0.94 (0.89–0.98)        | 13.63         |
| Rahav et al (2021) [62]                                          | 154/156          | 269/272                     | 1.00 (0.98–1.02)        | 15.12         |
| Wong et al (2022) [55]                                           | 202/213          | 78/80                       | 0.97 (0.93–1.02)        | 13.76         |
| <b>Overall(<math>I^2=96.7\%</math>, <math>p&lt;0.001</math>)</b> | <b>1225/1284</b> | <b>1693/1713</b>            | <b>0.97 (0.92–1.02)</b> | <b>100.00</b> |

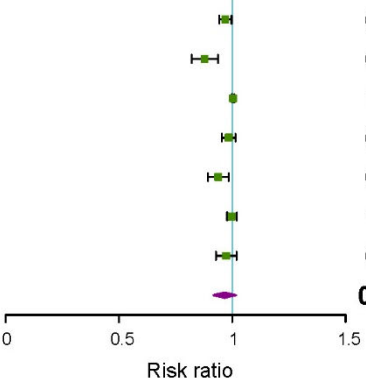

Figure S8: Sensitivity analysis of risk ratio of seroconversion by excluding studies with number of people living with HIV less than 100.

PLWH: people living with HIV;  $n_s$ : number of people with seroconversion; N: group size; RR: risk ratio; CI: confidence interval

### Total adverse events

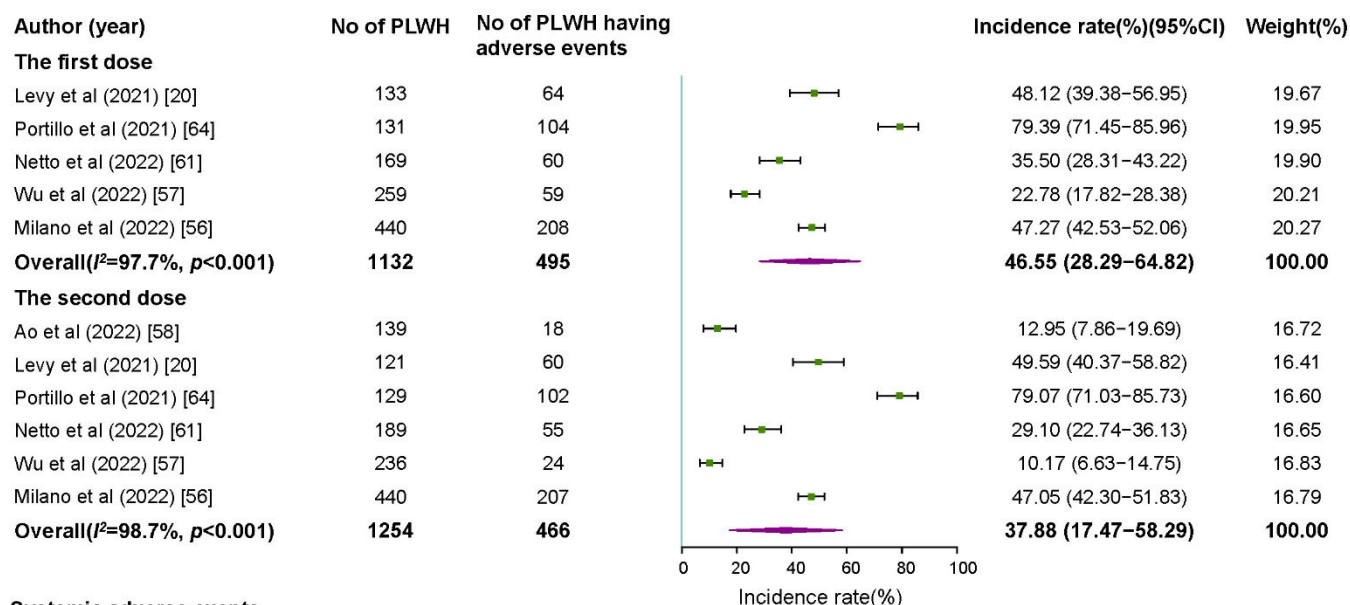

### Systemic adverse events

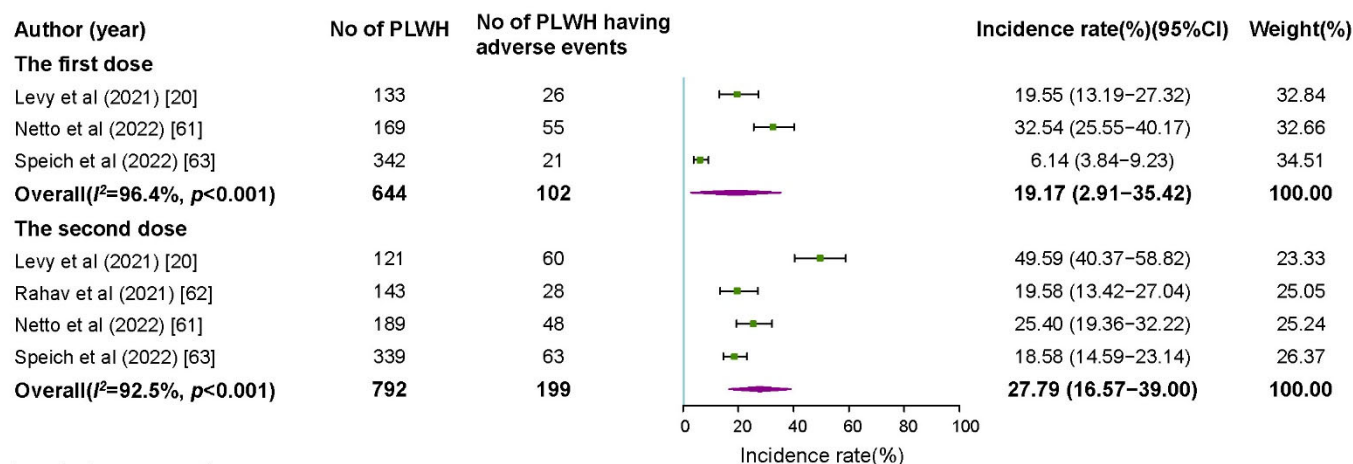

### Local adverse events

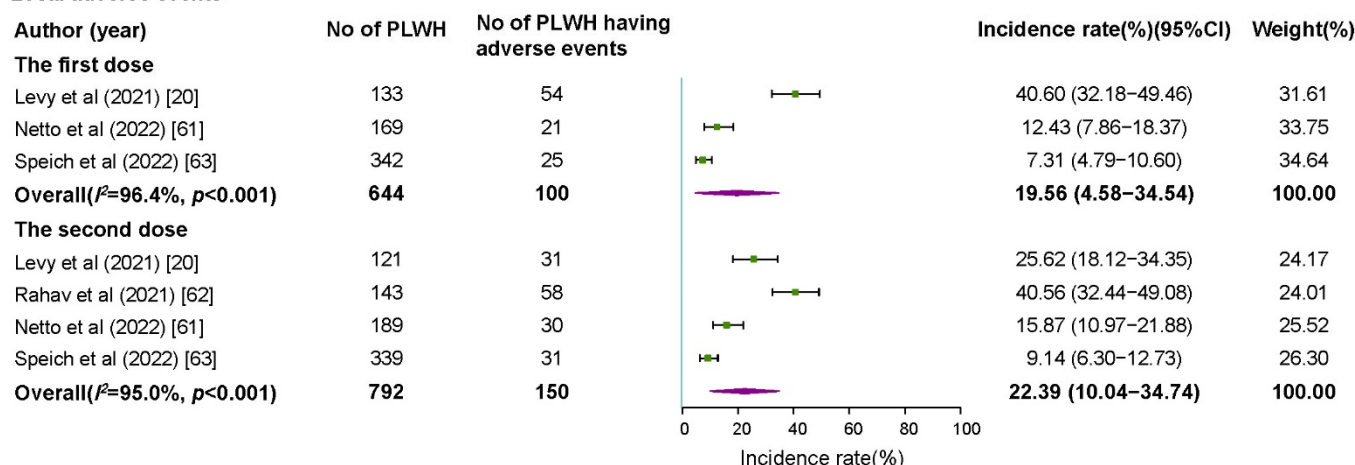

Figure S9 Sensitivity analysis of incidence rates of adverse events by excluding studies with number of people living with HIV less than 100.

PLWH: people living with HIV; CI: confidence interval.

The first dose

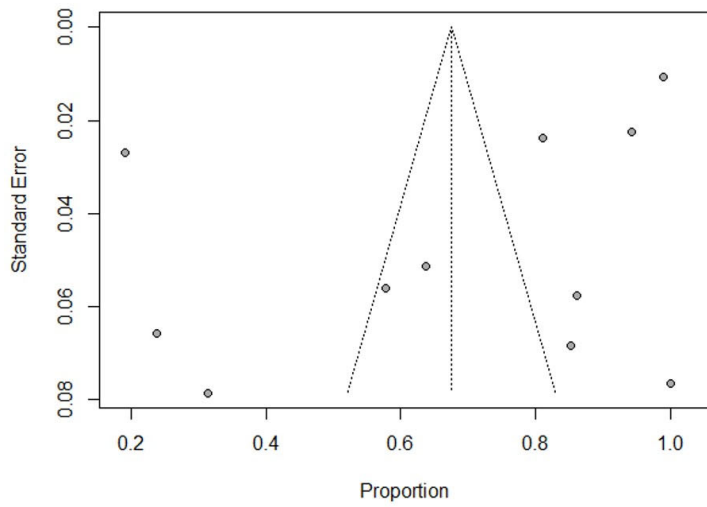

The second dose

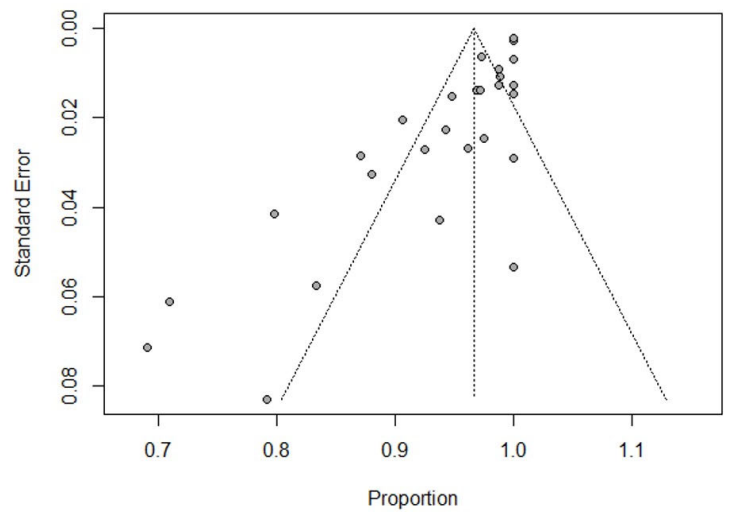

Figure S10: The publication bias of studies on seroconversion rates among people living with HIV after a first or second dose of COVID-19 vaccine

Egger's test:

The first dose: Test result:  $t = -1.83$ ,  $df = 9$ ,  $p\text{-value} = 0.1007$

The second dose: Test result:  $t = -6.51$ ,  $df = 26$ ,  $p\text{-value} < 0.0001$

The first dose

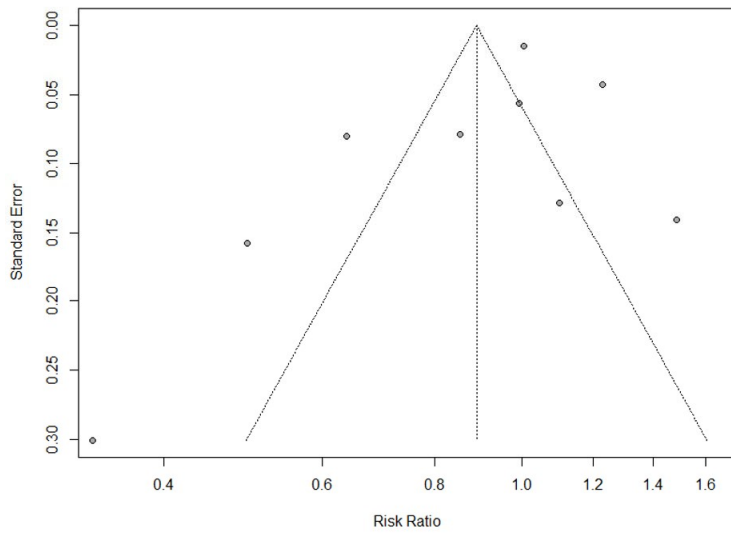

The second dose

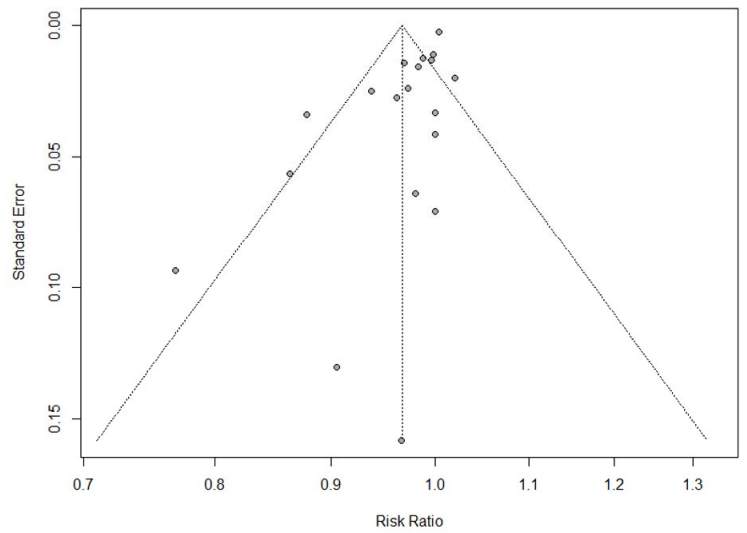

Figure S11: The publication bias of studies on seroconversion among people living with HIV compared with healthy controls after a first or second dose of COVID-19 vaccine

Egger's test:

The first dose Egger's test: Test result:  $t = -1.00$ ,  $df = 7$ ,  $p\text{-value} = 0.3502$

The second dose Egger's test: Test result:  $t = -3.81$ ,  $df = 17$ ,  $p\text{-value} = 0.0014$

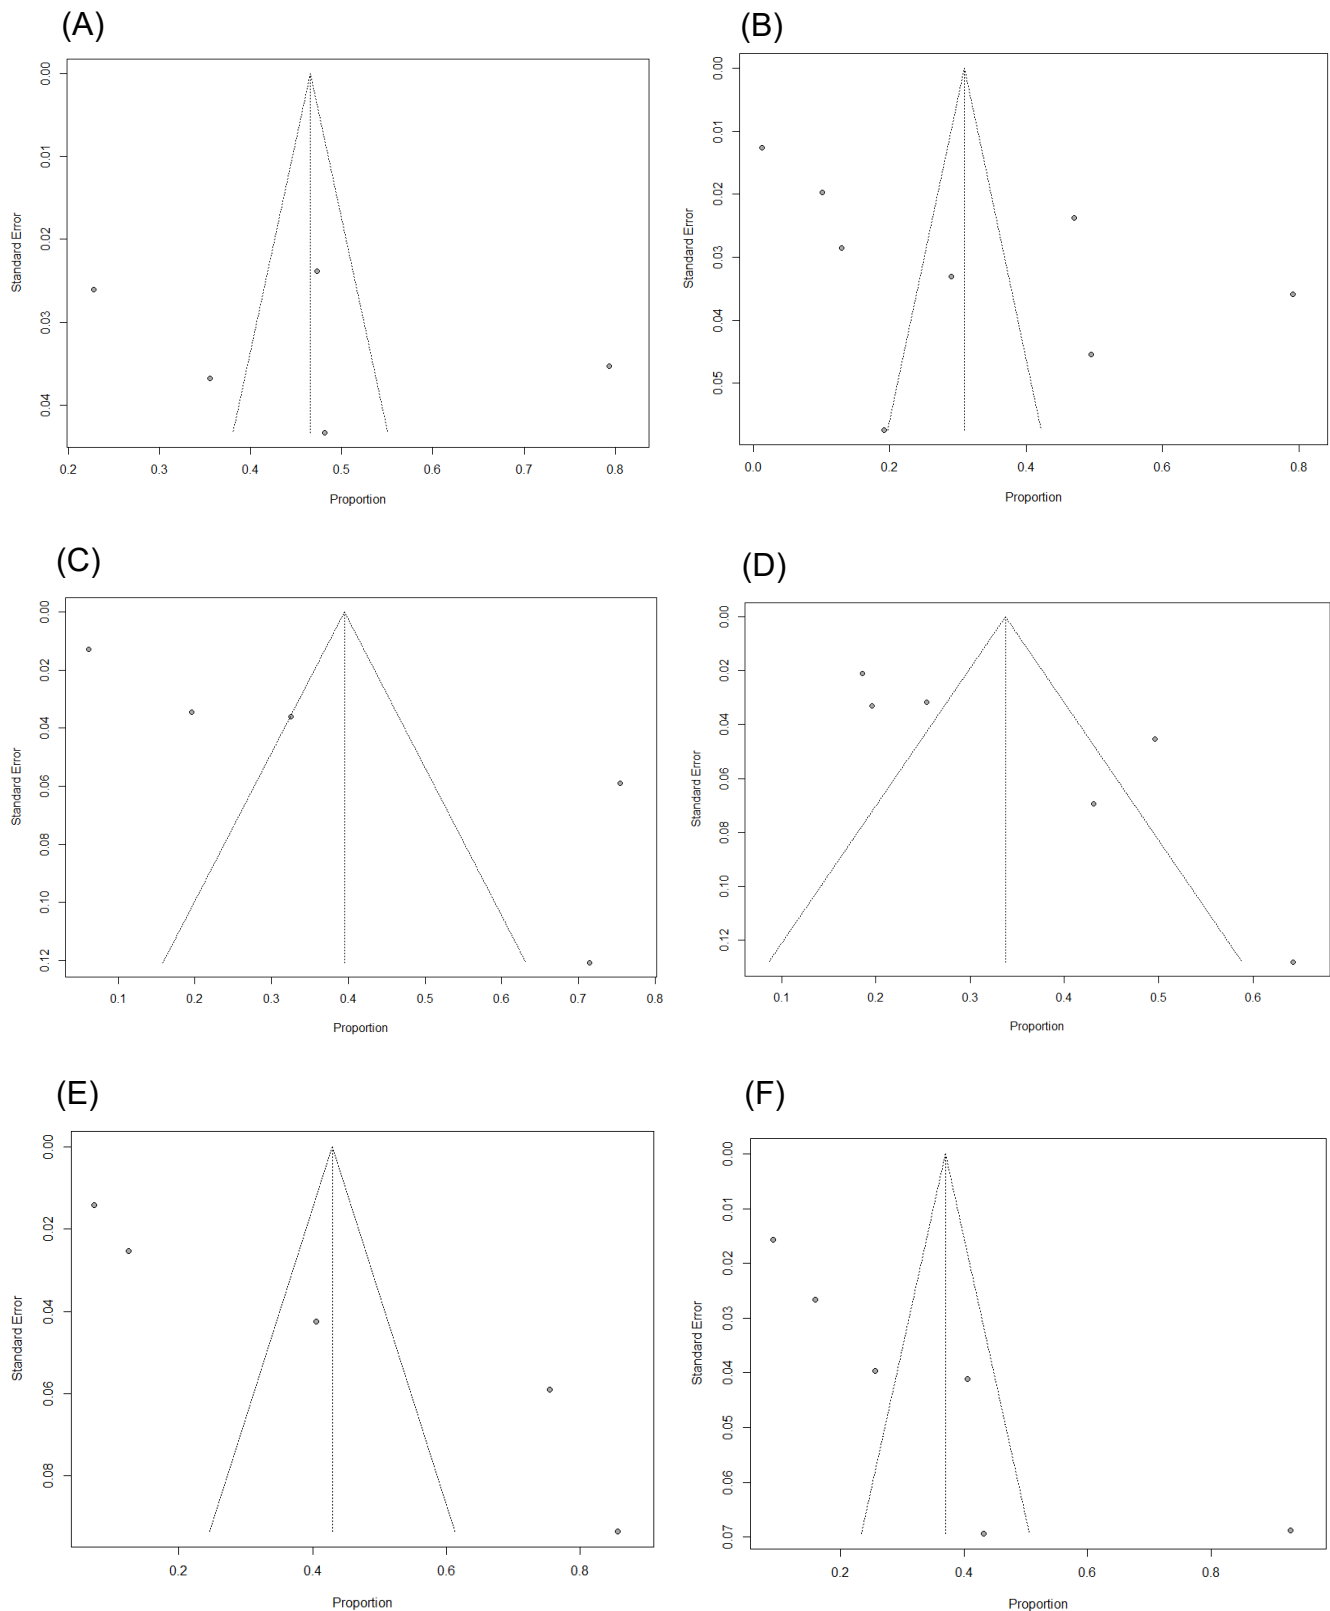

Figure S12: The publication bias of studies on incidence rates of adverse events among people living with HIV after a first or second dose of COVID-19 vaccine: (A) Total adverse events after the first dose; (B) Total adverse events after the second dose; (C) System adverse events after the first dose; (D) System adverse events after the second dose; (E) Local adverse events after the first dose; (F) Local adverse events after the second dose.



Table S1: Characteristics and basic information of the studies included in the systematic review and meta-analysis for COVID-19 vaccine immunogenicity

| Author         | Publication year | Study design                   | Country | Risk of bias | Vaccine type                       | Vaccine dose | Time after vaccination | CD4 cell count | No of PLWH | No of PLWH with seroconversion | No of healthy controls | No of healthy controls with seroconversion |
|----------------|------------------|--------------------------------|---------|--------------|------------------------------------|--------------|------------------------|----------------|------------|--------------------------------|------------------------|--------------------------------------------|
| Antinori et al | 2022             | cohort study                   | Italy   | Moderate     | BNT162b2 or mRNA-1273              | 2            | after 30d              |                | 160        | 155                            | 168                    | 168                                        |
| Antinori et al | 2022             | cohort study                   | Italy   | Moderate     | BNT162b2 or mRNA-1273              | 2            | after 30d              | <200           | 30         | 26                             | 168                    | 168                                        |
| Antinori et al | 2022             | cohort study                   | Italy   | Moderate     | BNT162b2 or mRNA-1273              | 2            | after 30d              | 200-500        | 53         | 53                             | 168                    | 168                                        |
| Antinori et al | 2022             | cohort study                   | Italy   | Moderate     | BNT162b2 or mRNA-1273              | 2            | after 30d              | >500           | 77         | 76                             | 168                    | 168                                        |
| Ao et al       | 2022             | cohort study                   | China   | Moderate     | BBIBP-CorV, Corona Vac             | 2            | ≥21d                   |                | 139        | 121                            | 120                    | 119                                        |
| Balcells et al | 2022             | cohort study                   | Chile   | Low          | CoronaVac                          | 2            | ≥56d                   |                | 55         | 39                             | 65                     | 60                                         |
| Bergman et al  | 2021             | non-randomized clinical trials | Sweden  | Moderate     | BNT162b2                           | 2            | after 14d              |                | 79         | 78                             | 78                     | 78                                         |
| Bergman et al  | 2021             | non-randomized clinical trials | Sweden  | Moderate     | BNT162b2                           | 2            | after 14d              | >300           | 54         | 54                             | 78                     | 78                                         |
| Bergman et al  | 2021             | non-randomized clinical trials | Sweden  | Moderate     | BNT162b2                           | 2            | after 14d              | ≤300           | 25         | 24                             | 78                     | 78                                         |
| Brumme et al   | 2022             | cohort study                   | Canada  | High         | BNT162b2 or mRNA-1273 or ChAdOx1   | 1            | after 30d              |                | 92         | 91                             | 137                    | 135                                        |
| Brumme et al   | 2022             | cohort study                   | Canada  | High         | BNT162b2 or mRNA-1273 or ChAdOx1-S | 2            | after 30d              |                | 92         | 91                             | 137                    | 136                                        |
| Feng et al     | 2022             | non-randomized clinical trials | China   | Moderate     | BBIBP-CorV                         | 1            | after 28d              |                | 42         | 10                             | 28                     | 20                                         |
| Feng et al     | 2022             | non-randomized clinical trials | China   | Moderate     | BBIBP-CorV                         | 2            | after 28d              |                | 42         | 29                             | 28                     | 20                                         |
| Frater et al   | 2021             | non-randomized clinical trials | UK      | High         | ChAdOx1                            | 2            | after 14d              |                | 54         | 54                             | 50                     | 49                                         |
| Gonzalez et al | 2022             | cross-sectional study          | Spain   | Low          | mRNA-1273 and BNT162b2             | 2            | after 28d              |                | 100        | 100                            |                        |                                            |
| Haidar et al   | 2022             | cohort study                   | US      | Low          | any vaccine                        | 2            | ≥14d                   |                | 94         | 75                             | 172                    | 159                                        |
| Han et al      | 2022             | cohort study                   | China   | Low          | Sinovac CoronaVac or Sinopharm     | 2            | after 14d              |                | 47         | 47                             | 18                     | 18                                         |

|               |      |                                |              |          |                                    |   |              |      |     |     |     |     |
|---------------|------|--------------------------------|--------------|----------|------------------------------------|---|--------------|------|-----|-----|-----|-----|
| Hassold et al | 2022 | cross-sectional study          | France       | Low      | BNT162b2 mRNA-1273 ChAdOx1-S or or | 2 | after 8-150d |      | 105 | 99  |     |     |
| Hassold et al | 2022 | cross-sectional study          | France       | Low      | BNT162b2 mRNA-1273 ChAdOx1-S or or | 2 | after 8-150d | <500 | 54  | 48  |     |     |
| Hassold et al | 2022 | cross-sectional study          | France       | Low      | BNT162b2 mRNA-1273 ChAdOx1-S or or | 2 | after 8-150d | >500 | 51  | 51  |     |     |
| Heftdal et al | 2022 | cohort study                   | Denmark      | Moderate | BNT162b2                           | 1 | after 14d    |      | 269 | 218 | 538 | 355 |
| Heftdal et al | 2022 | cohort study                   | Denmark      | Moderate | BNT162b2                           | 2 | after 7d     |      | 269 | 269 | 538 | 536 |
| Huang et al   | 2022 | cross-sectional study          | China        | Low      | Sinovac CoronaVac Sinopharm or     | 1 |              |      | 35  | 11  |     |     |
| Huang et al   | 2022 | cross-sectional study          | China        | Low      | Sinovac CoronaVac Sinopharm or     | 2 |              |      | 94  | 87  |     |     |
| Jedicke et al | 2022 | cohort study                   | Germany      | Moderate | BNT162b2                           | 1 | after 18.7d  |      | 88  | 56  | 41  | 41  |
| Jedicke et al | 2022 | cohort study                   | Germany      | Moderate | BNT162b2                           | 2 | after 35d    |      | 52  | 50  | 41  | 41  |
| Khan et al    | 2021 | non-randomized clinical trials | South Africa | High     | Ad26.CoV2.S                        | 1 | after 74d    |      | 8   | 8   | 24  | 16  |
| Levy et al    | 2021 | cohort study                   | Israel       | Moderate | BNT162b2                           | 2 | after 18d    |      | 143 | 139 | 261 | 258 |
| Liu et al     | 2021 | cross-sectional study          | China        | Low      | CoronaVac BBIBP-CorV or            | 2 | after 14d    |      | 55  | 55  |     |     |
| Lv et al      | 2022 | non-randomized clinical trials | China        | Low      | CoronaVac BBIBP-CorV or            | 2 | after 40d    |      | 24  | 19  | 24  | 21  |
| Madhi et al   | 2021 | RCT                            | South Africa | Moderate | ChAdOx1-S                          | 1 | after 28d    |      | 36  | 31  | 23  | 18  |
| Madhi et al   | 2021 | RCT                            | South Africa | Moderate | ChAdOx1-S                          | 2 | after 14d    |      | 32  | 30  | 23  | 22  |
| Nault et al   | 2022 | cohort study                   | Canada       | Moderate | mRNA-1273 BNT162b2 or              | 1 | after 21-28d |      | 106 | 100 | 20  | 19  |
| Netto et al   | 2022 | cohort study                   | Brazil       | Low      | CoronaVac                          | 1 | after 28d    |      | 214 | 41  | 295 | 114 |
| Netto et al   | 2022 | cohort study                   | Brazil       | Low      | CoronaVac                          | 2 | after 42d    |      | 204 | 185 | 274 | 265 |
| Netto et al   | 2022 | cohort study                   | Brazil       | Low      | CoronaVac                          | 1 | after 28d    | <500 | 64  | 10  | 295 | 114 |
| Netto et al   | 2022 | cohort study                   | Brazil       | Low      | CoronaVac                          | 1 | after 28d    | ≥500 | 150 | 31  | 295 | 114 |
| Netto et al   | 2022 | cohort study                   | Brazil       | Low      | CoronaVac                          | 2 | after 42d    | <500 | 62  | 51  | 274 | 265 |
| Netto et al   | 2022 | cohort study                   | Brazil       | Low      | CoronaVac                          | 2 | after 42d    | ≥500 | 142 | 134 | 274 | 265 |

|                   |      |                                |         |          |                                                             |   |              |      |     |     |     |     |
|-------------------|------|--------------------------------|---------|----------|-------------------------------------------------------------|---|--------------|------|-----|-----|-----|-----|
| Noe et al         | 2021 | cross-sectional study          | Germany | Moderate | BNT162b2 or mRNA-1273 or ChAdOx1-S COVID-19 Vaccine Janssen | 2 |              |      | 665 | 647 |     |     |
| Portillo et al    | 2021 | cohort study                   | Swiss   | Moderate | mRNA-1273 BNT162b2 or                                       | 1 | after 28d    |      | 129 |     | 49  |     |
| Ogbe et al        | 2022 | non-randomized clinical trials | UK      | Moderate | ChAdOx1-S                                                   | 2 | after 180d   |      | 42  | 35  |     |     |
| Oyaert et al      | 2022 | cohort study                   | Belgium | Low      | BNT162b2                                                    | 1 | after 21-28d | <350 | 27  | 23  | 54  | 54  |
| Oyaert et al      | 2022 | cohort study                   | Belgium | Low      | BNT162b2                                                    | 2 | after 10-14d | <350 | 23  | 23  | 52  | 52  |
| Rahav et al       | 2021 | cohort study                   | Israel  | Moderate | BNT162b2                                                    | 2 | after 19d    |      | 156 | 154 | 272 | 269 |
| Speich et al      | 2022 | RCT                            | Swiss   | Moderate | mRNA-1273 or BNT162b2                                       | 2 | after 56d    |      | 341 | 341 |     |     |
| Spinelli et al    | 2021 | case-control study             | US      | Low      | mRNA-1273 or BNT162b2                                       | 2 | after 35d    |      | 100 | 88  |     |     |
| Tuan et al        | 2022 | cross-sectional study          | US      | Low      | BNT162b2                                                    | 1 | after 21d    |      | 78  | 45  |     |     |
| Tuan et al        | 2022 | cross-sectional study          | US      | Low      | BNT162b2                                                    | 2 | after 14-21d |      | 40  | 39  |     |     |
| Woldemeskel et al | 2022 | cohort study                   | US      | High     | BNT162b2                                                    | 2 | after 7-17d  |      | 12  | 12  | 17  | 17  |
| Wong et al        | 2022 | cohort study                   | China   | Low      | BNT162b2 or CoronaVac                                       | 2 | after 14-42d |      | 213 | 202 | 80  | 78  |
| Wong et al        | 2022 | cohort study                   | China   | Low      | CoronaVac                                                   | 2 | after 14-42d |      | 74  | 64  | 32  | 30  |
| Wong et al        | 2022 | cohort study                   | China   | Low      | BNT162b2                                                    | 2 | after 14-42d |      | 139 | 138 | 48  | 48  |

Table S2: Characteristics and basic information of the studies included in the systematic review and meta-analysis for COVID-19 vaccine safety

| Author        | Publication year | Study design                   | Country | Risk of bias | Vaccine type                   | Vaccine dose | Type of adverse events | No of PLWH | No of PLWH having adverse events | No of healthy controls | No of healthy controls having adverse events |
|---------------|------------------|--------------------------------|---------|--------------|--------------------------------|--------------|------------------------|------------|----------------------------------|------------------------|----------------------------------------------|
| Ao et al      | 2022             | cohort study                   | China   | Moderate     | BBIBP-CorV, Corona Vac         | 2            | total                  | 139        | 18                               | 120                    | 16                                           |
| Bergman et al | 2021             | non-randomized clinical trials | Sweden  | Moderate     | BNT162b2                       | 2            | total                  | 79         | 1                                | 78                     | 0                                            |
| Frater et al  | 2021             | non-randomized clinical trials | UK      | High         | ChAdOx1-S                      | 1            | system                 | 53         | 40                               | 50                     | 43                                           |
| Frater et al  | 2021             | non-randomized clinical trials | UK      | High         | ChAdOx1-S                      | 1            | local                  | 53         | 40                               | 50                     | 44                                           |
| Frater et al  | 2021             | non-randomized clinical trials | UK      | High         | ChAdOx1-S                      | 2            | system                 | 51         | 22                               | 49                     | 32                                           |
| Frater et al  | 2021             | non-randomized clinical trials | UK      | High         | ChAdOx1-S                      | 2            | local                  | 51         | 22                               | 49                     | 37                                           |
| Han et al     | 2022             | cohort study                   | China   | Low          | Sinovac CoronaVac or Sinopharm | 2            | total                  | 47         | 9                                |                        |                                              |
| Levy et al    | 2021             | cohort study                   | Israel  | Moderate     | BNT162b2                       | 2            | total                  | 121        | 60                               |                        |                                              |
| Levy et al    | 2021             | cohort study                   | Israel  | Moderate     | BNT162b2                       | 1            | total                  | 133        | 64                               |                        |                                              |
| Levy et al    | 2021             | cohort study                   | Israel  | Moderate     | BNT162b2                       | 1            | system                 | 133        | 26                               |                        |                                              |
| Levy et al    | 2021             | cohort study                   | Israel  | Moderate     | BNT162b2                       | 1            | local                  | 133        | 54                               |                        |                                              |
| Levy et al    | 2021             | cohort study                   | Israel  | Moderate     | BNT162b2                       | 2            | system                 | 121        | 60                               |                        |                                              |
| Levy et al    | 2021             | cohort study                   | Israel  | Moderate     | BNT162b2                       | 2            | local                  | 121        | 31                               |                        |                                              |
| Milano et al  | 2022             | cohort study                   | Italy   | Moderate     | BNT162b2                       | 2            | total                  | 440        | 207                              |                        |                                              |
| Milano et al  | 2022             | cohort study                   | Italy   | Moderate     | BNT162b2                       | 1            | total                  | 440        | 208                              |                        |                                              |
| Netto et al   | 2022             | cohort study                   | Brazil  | Low          | CoronaVac                      | 2            | total                  | 189        | 55                               | 265                    | 91                                           |
| Netto et al   | 2022             | cohort study                   | Brazil  | Low          | CoronaVac                      | 1            | total                  | 169        | 60                               | 296                    | 122                                          |
| Netto et al   | 2022             | cohort study                   | Brazil  | Low          | CoronaVac                      | 2            | system                 | 189        | 48                               | 265                    | 78                                           |
| Netto et al   | 2022             | cohort study                   | Brazil  | Low          | CoronaVac                      | 1            | system                 | 169        | 55                               | 296                    | 97                                           |
| Netto et al   | 2022             | cohort study                   | Brazil  | Low          | CoronaVac                      | 1            | local                  | 169        | 21                               | 296                    | 61                                           |
| Netto et al   | 2022             | cohort study                   | Brazil  | Low          | CoronaVac                      | 2            | local                  | 189        | 30                               | 265                    | 45                                           |

|                |      |                       |        |          |                       |   |        |     |     |     |     |
|----------------|------|-----------------------|--------|----------|-----------------------|---|--------|-----|-----|-----|-----|
| Portillo et al | 2021 | cohort study          | Swiss  | Moderate | mRNA1273 or BNT162b2  | 2 | total  | 129 | 102 |     |     |
| Portillo et al | 2021 | cohort study          | Swiss  | Moderate | mRNA1273 or BNT162b2  | 1 | total  | 131 | 104 |     |     |
| Rahav et al    | 2021 | cohort study          | Israel | Moderate | BNT162b2              | 2 | system | 143 | 28  | 272 | 57  |
| Rahav et al    | 2021 | cohort study          | Israel | Moderate | BNT162b2              | 2 | local  | 143 | 58  | 272 | 199 |
| Ruddy et al    | 2021 | cohort study          | US     | Moderate | BNT162b2 or mRNA-1273 | 2 | system | 14  | 9   |     |     |
| Ruddy et al    | 2021 | cohort study          | US     | Moderate | BNT162b2 or mRNA-1273 | 1 | system | 14  | 10  |     |     |
| Ruddy et al    | 2021 | cohort study          | US     | Moderate | BNT162b2 or mRNA-1273 | 1 | local  | 14  | 12  |     |     |
| Ruddy et al    | 2021 | cohort study          | US     | Moderate | BNT162b2 or mRNA-1273 | 2 | local  | 14  | 13  |     |     |
| Speich et al   | 2022 | RCT                   | Swiss  | Moderate | mRNA-1273 or BNT162b2 | 2 | system | 339 | 63  |     |     |
| Speich et al   | 2022 | RCT                   | Swiss  | Moderate | mRNA-1273 or BNT162b2 | 1 | system | 342 | 21  |     |     |
| Speich et al   | 2022 | RCT                   | Swiss  | Moderate | mRNA-1273 or BNT162b2 | 2 | local  | 339 | 31  |     |     |
| Speich et al   | 2022 | RCT                   | Swiss  | Moderate | mRNA-1273 or BNT162b2 | 1 | local  | 342 | 25  |     |     |
| Wu et al       | 2022 | cross-sectional study | China  |          | Sinopharm             | 1 | total  | 259 | 59  |     |     |
| Wu et al       | 2022 | cross-sectional study | China  |          | Sinopharm             | 2 | total  | 236 | 24  |     |     |

Table S3: Risk of bias of all included randomized clinical trials using the revised Cochrane risk-of-bias tool for randomized trials (RoB 2)

| Author       | Bias arising from the randomization process | Bias due to deviations from intended interventions | Bias due to missing outcome data | Bias in measurement of the outcome | Bias in selection of the reported result | Total risk    |
|--------------|---------------------------------------------|----------------------------------------------------|----------------------------------|------------------------------------|------------------------------------------|---------------|
| Madhi et al  | low risk                                    | low risk                                           | low risk                         | some concerns                      | low risk                                 | some concerns |
| Speich et al | some concerns                               | low risk                                           | low risk                         | low risk                           | low risk                                 | some concerns |

Table S4: Risk of bias of all included non-randomized clinical trials using the Risk of Bias in Non-randomized Studies of Interventions (ROBINS-I) tool

[illegible]



Table S5: Risk of bias of all included cohort studies using the Newcastle-Ottawa quality assessment scale

| Author            | Selection                                |                                     |                           |                                                                          | Comparability | Outcome               |                                                 |                                  | Total score | Risk level* |
|-------------------|------------------------------------------|-------------------------------------|---------------------------|--------------------------------------------------------------------------|---------------|-----------------------|-------------------------------------------------|----------------------------------|-------------|-------------|
|                   | Representativeness of the Exposed Cohort | Selection of the Non-Exposed Cohort | Ascertainment of Exposure | Demonstration That Outcome of Interest Was Not Present at Start of Study |               | Assessment of Outcome | Was Follow-Up Long Enough for Outcomes to Occur | Adequacy of Follow Up of Cohorts |             |             |
| Antinori et al    | 0                                        | 0                                   | 1                         | 1                                                                        | 2             | 1                     | 0                                               | 1                                | 6           | moderate    |
| Balcells et al    | 0                                        | 1                                   | 1                         | 1                                                                        | 2             | 1                     | 1                                               | 1                                | 8           | low         |
| Ao et al          | 0                                        | 0                                   | 1                         | 1                                                                        | 2             | 1                     | 1                                               | 0                                | 6           | moderate    |
| Haidar et al      | 1                                        | 1                                   | 0                         | 1                                                                        | 1             | 1                     | 1                                               | 1                                | 7           | low         |
| Han et al         | 0                                        | 1                                   | 1                         | 1                                                                        | 2             | 1                     | 1                                               | 1                                | 8           | low         |
| Heftdal et al     | 0                                        | 1                                   | 1                         | 0                                                                        | 1             | 1                     | 1                                               | 1                                | 6           | moderate    |
| Jedicke et al     | 0                                        | 0                                   | 1                         | 1                                                                        | 1             | 1                     | 1                                               | 0                                | 5           | moderate    |
| Levy et al        | 0                                        | 0                                   | 1                         | 1                                                                        | 2             | 1                     | 0                                               | 1                                | 6           | moderate    |
| Rahav et al       | 0                                        | 0                                   | 1                         | 1                                                                        | 1             | 1                     | 1                                               | 1                                | 6           | moderate    |
| Oyaert et al      | 0                                        | 1                                   | 1                         | 1                                                                        | 1             | 1                     | 1                                               | 1                                | 7           | low         |
| Portillo et al    | 1                                        | 0                                   | 1                         | 0                                                                        | 1             | 1                     | 1                                               | 1                                | 6           | moderate    |
| Netto et al       | 0                                        | 0                                   | 1                         | 1                                                                        | 2             | 1                     | 1                                               | 1                                | 7           | low         |
| Wong et al        | 0                                        | 1                                   | 0                         | 1                                                                        | 2             | 1                     | 1                                               | 1                                | 7           | low         |
| Woldemeskel et al | 0                                        | 0                                   | 1                         | 0                                                                        | 1             | 0                     | 0                                               | 1                                | 3           | high        |
| Nault et al       | 0                                        | 0                                   | 1                         | 0                                                                        | 1             | 1                     | 1                                               | 1                                | 5           | moderate    |
| Brumme et al      | 0                                        | 0                                   | 1                         | 0                                                                        | 1             | 0                     | 1                                               | 0                                | 3           | high        |
| Milanoc et al     | 0                                        | 0                                   | 1                         | 1                                                                        | 0             | 1                     | 1                                               | 1                                | 5           | moderate    |
| Ruddy et al       | 0                                        | 1                                   | 0                         | 0                                                                        | 2             | 1                     | 1                                               | 1                                | 6           | moderate    |

\*Low (total score  $\geq 7$ ), moderate (total score 5-6), and high (total score  $\leq 4$ ) risk of bias.

Table S6: Risk of bias of all included case-control studies using the Newcastle-Ottawa quality assessment scale

| Author         | Selection                        |                                 |                       |                        | Comparability                                                                                                               | Exposure                  |                                                     |                   | Total score | Risk level* |
|----------------|----------------------------------|---------------------------------|-----------------------|------------------------|-----------------------------------------------------------------------------------------------------------------------------|---------------------------|-----------------------------------------------------|-------------------|-------------|-------------|
|                | Is the case definition adequate? | Representativeness of the cases | Selection of Controls | Definition of Controls | Study controls for antibody positive rate, antibody (the most important factor)<br>Study controls for any additional factor | Ascertainment of exposure | Same method of ascertainment for cases and controls | Non-Response rate |             |             |
| Spinelli et al | 1                                | 1                               | 0                     | 1                      | 1                                                                                                                           | 1                         | 1                                                   | 0                 | 7           | low         |

\*Low (total score  $\geq 7$ ), moderate (total score 5-6), and high (total score  $\leq 4$ ) risk of bias.

Table S7: Risk of bias of all included cross-sectional studies using the Agency for Healthcare Research and Quality scale

| Author         | 1) Define the source of information (survey, record review) | 2) List inclusion and exclusion criteria for exposed and unexposed subjects (cases and controls) or refer to previous publications | 3) Indicate time period used for identifying patients | 4) Indicate whether or not subjects were consecutive if not population-based | 5) Indicate if evaluators of subjective components of study were masked to other aspects of the status of the participants | 6) Describe any assessments undertaken for quality assurance purposes (e.g., test/retest of primary outcome measurements) | 7) Explain any patient exclusions from analysis | 8) Describe how confounding was assessed and/or controlled. | 9) If applicable, explain how missing data were handled in the analysis | 10) Summarize patient response rates and completeness of data collection | 11) Clarify what follow-up, if any, was expected and the percentage of patients for which incomplete data or follow-up was obtained | Total scores | Article quality* |
|----------------|-------------------------------------------------------------|------------------------------------------------------------------------------------------------------------------------------------|-------------------------------------------------------|------------------------------------------------------------------------------|----------------------------------------------------------------------------------------------------------------------------|---------------------------------------------------------------------------------------------------------------------------|-------------------------------------------------|-------------------------------------------------------------|-------------------------------------------------------------------------|--------------------------------------------------------------------------|-------------------------------------------------------------------------------------------------------------------------------------|--------------|------------------|
| Gonzalez et al | yes                                                         | yes                                                                                                                                | unclear                                               | yes                                                                          | no                                                                                                                         | no                                                                                                                        | yes                                             | yes                                                         | yes                                                                     | yes                                                                      | yes                                                                                                                                 | 8            | high             |
| Hassold et al  | yes                                                         | yes                                                                                                                                | yes                                                   | yes                                                                          | no                                                                                                                         | yes                                                                                                                       | no                                              | yes                                                         | yes                                                                     | yes                                                                      | yes                                                                                                                                 | 9            | high             |
| Huang et al    | yes                                                         | yes                                                                                                                                | yes                                                   | yes                                                                          | no                                                                                                                         | yes                                                                                                                       | yes                                             | yes                                                         | yes                                                                     | yes                                                                      | yes                                                                                                                                 | 10           | high             |
| Liu et al      | yes                                                         | yes                                                                                                                                | yes                                                   | yes                                                                          | no                                                                                                                         | no                                                                                                                        | yes                                             | yes                                                         | yes                                                                     | yes                                                                      | yes                                                                                                                                 | 9            | high             |
| Noe et al      | yes                                                         | yes                                                                                                                                | yes                                                   | no                                                                           | no                                                                                                                         | no                                                                                                                        | yes                                             | yes                                                         | unclear                                                                 | yes                                                                      | no                                                                                                                                  | 6            | moderate         |
| Wu et al       | unclear                                                     | unclear                                                                                                                            | yes                                                   | yes                                                                          | no                                                                                                                         | yes                                                                                                                       | yes                                             | yes                                                         | yes                                                                     | no                                                                       | yes                                                                                                                                 | 7            | moderate         |
| Tuan et al     | yes                                                         | yes                                                                                                                                | yes                                                   | yes                                                                          | yes                                                                                                                        | yes                                                                                                                       | yes                                             | yes                                                         | unclear                                                                 | yes                                                                      | yes                                                                                                                                 | 10           | high             |

Note: low quality (high risk of bias) (0–3 score), moderate quality (moderate risk of bias) (4–7score), high quality (low risk of bias) (8–11score) of articles.
